# Supplementary material for: Syncytin-mediated open-ended membrane tubular connections facilitate the intercellular transfer of cargos including Cas9 protein
Source: eLife journal article supplement (doi:10.7554/elife.84391), 2023-03-10
Supplement: fig1-data1 [file elife-84391-fig1-data1-v2.zip]

Figure 1B

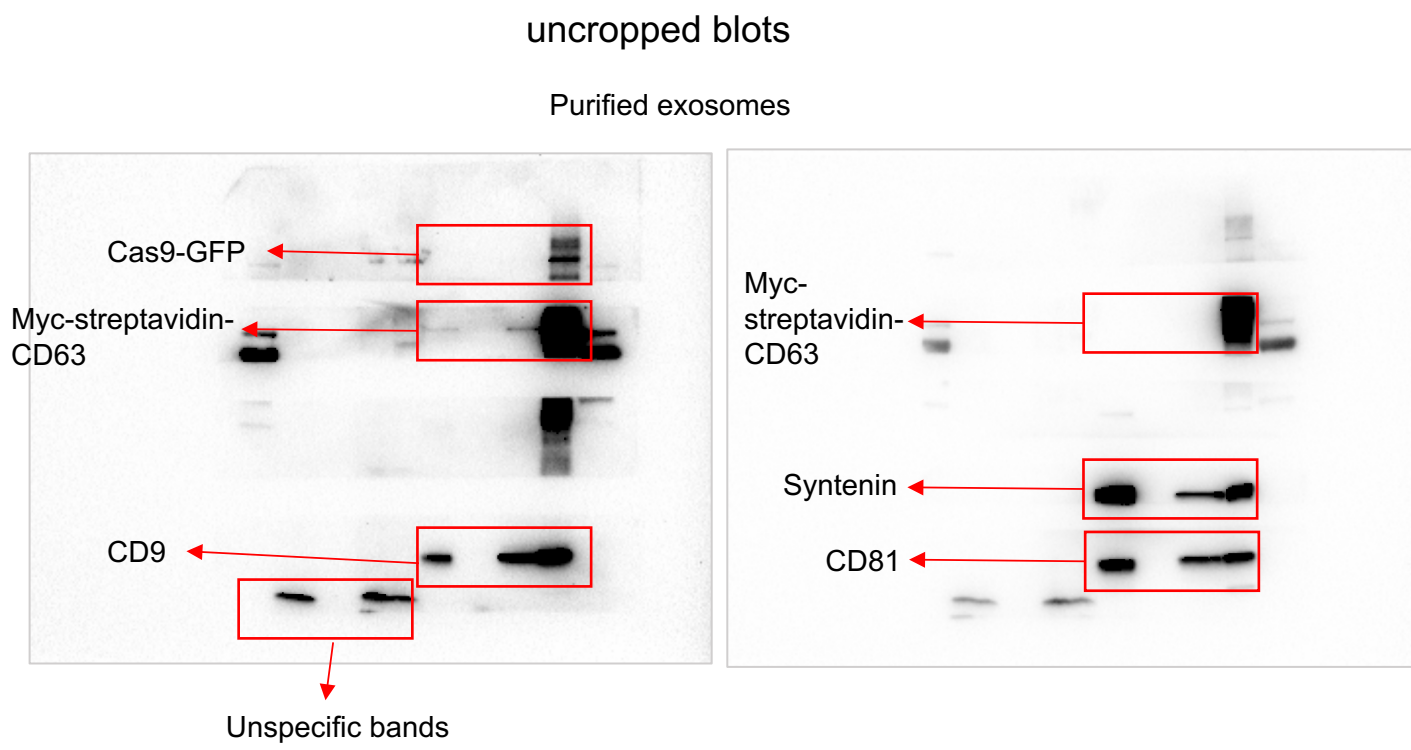

B

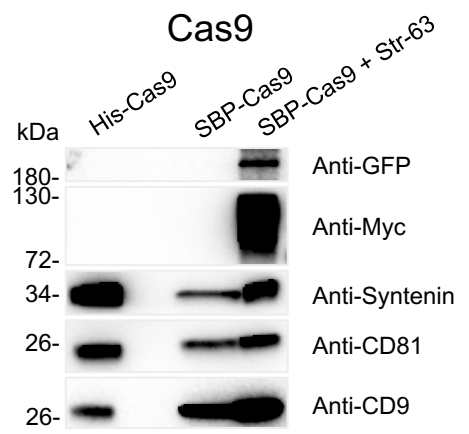

Cas9-GFP protein was detected in exosomes from the cells expressing both SBP-Flag-Cas9-GFP and Myc-Streptavidin-CD63-mCherry.
