# Supplementary material for: Syncytin-mediated open-ended membrane tubular connections facilitate the intercellular transfer of cargos including Cas9 protein
Source: eLife journal article supplement (doi:10.7554/elife.84391), 2023-03-10
Supplement: fig1-figsupp1-data2 [file elife-84391-fig1-figsupp1-data2-v2.zip]

Figure 1-figure supplement 1B

uncropped blots

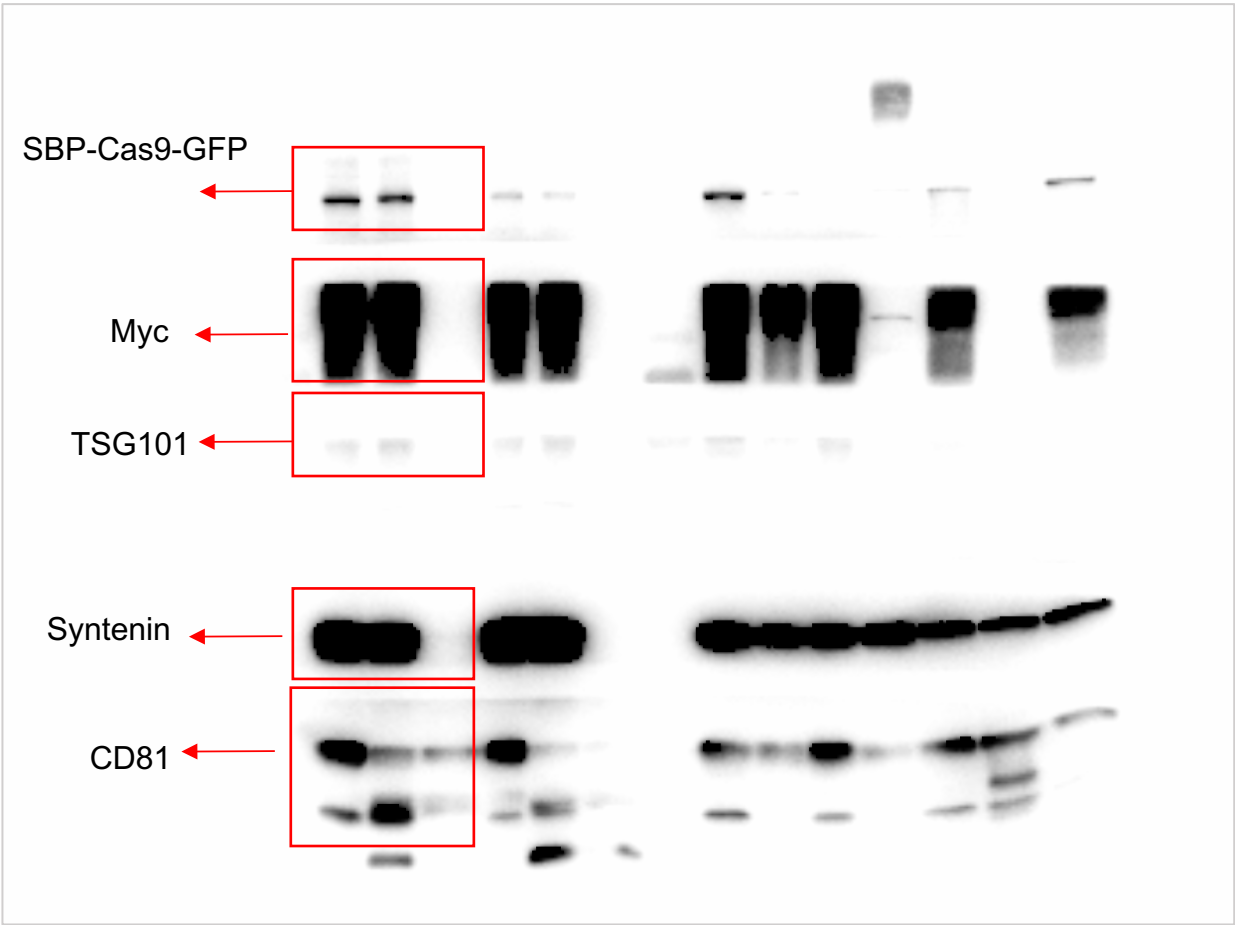

Note: the other lanes are for other experiments.

B

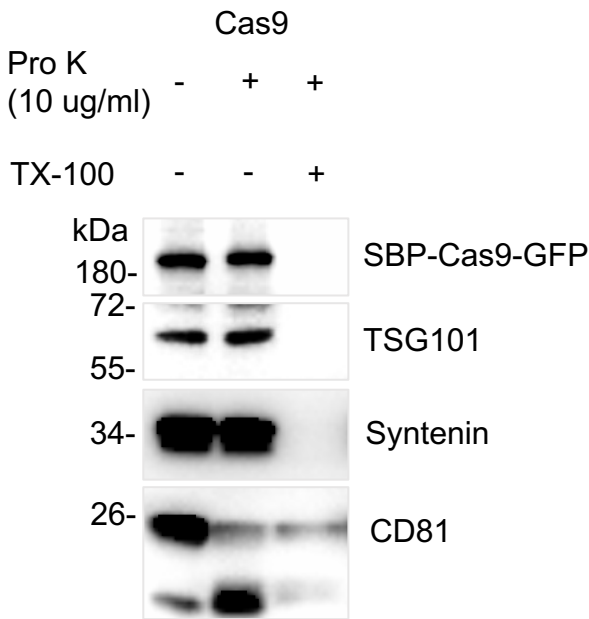

Exosomes from cells expressed both SBP-Flag-Cas9-GFP and Myc-Streptavidin-CD63-mCherry were purified and exposed to proteinase K with or without Triton X-100, showing Cas9 localized within exosomes.
