# Supplementary material for: Syncytin-mediated open-ended membrane tubular connections facilitate the intercellular transfer of cargos including Cas9 protein
Source: eLife journal article supplement (doi:10.7554/elife.84391), 2023-03-10
Supplement: fig3-figsupp2-data1 [file elife-84391-fig3-figsupp2-data1-v2.zip]

Figure 3-figure supplement 2A

uncropped blots

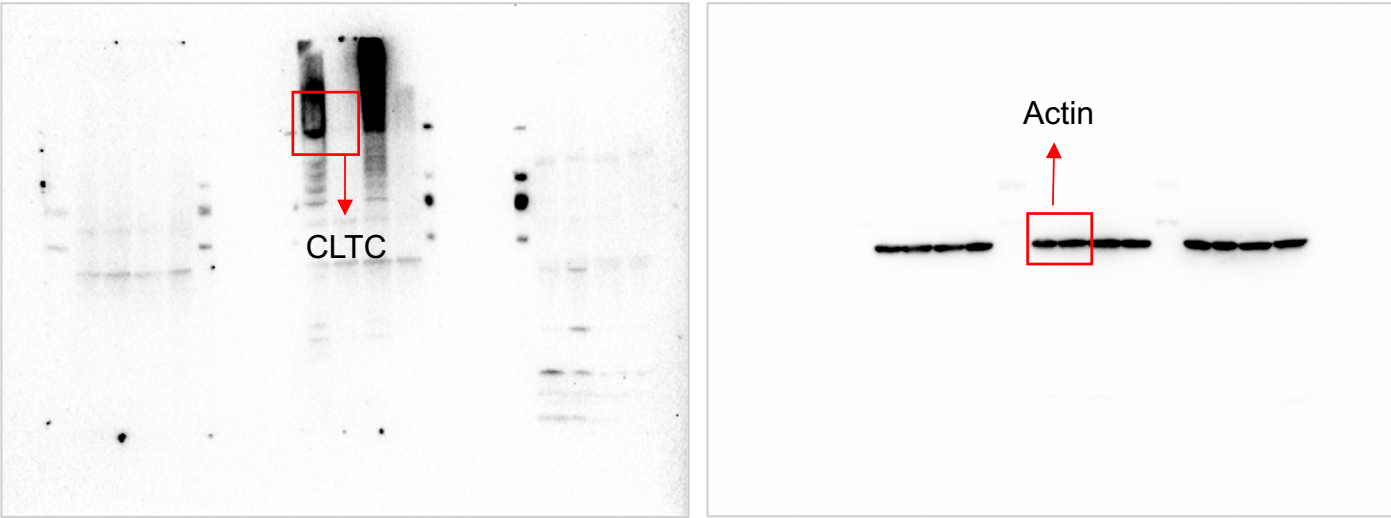

Note: the other lanes are for other experiments.

A

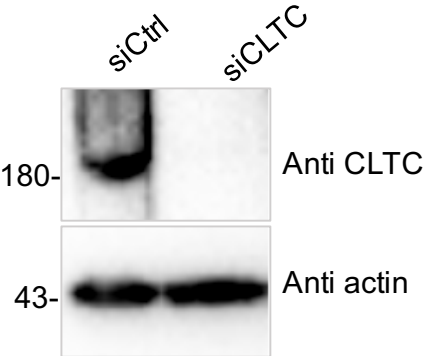

CLTC was knocked-down by siRNA in MDA-MB-231 cells.
