# Supplementary material for: Syncytin-mediated open-ended membrane tubular connections facilitate the intercellular transfer of cargos including Cas9 protein
Source: eLife journal article supplement (doi:10.7554/elife.84391), 2023-03-10
Supplement: fig3-figsupp2-data5 [file elife-84391-fig3-figsupp2-data5-v2.zip]

Figure 3-figure supplement 2E, 2H

uncropped blots

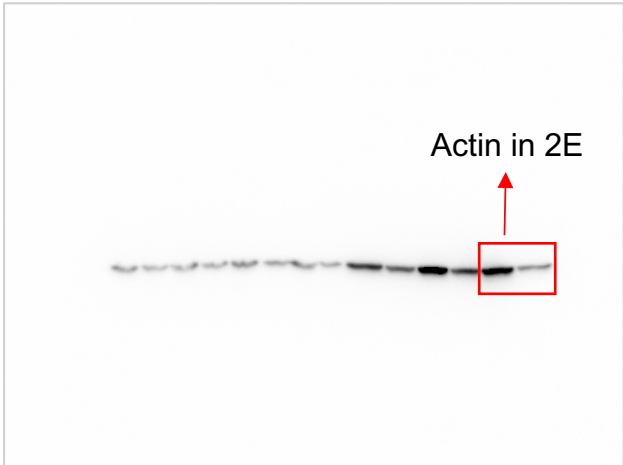

Long exposure

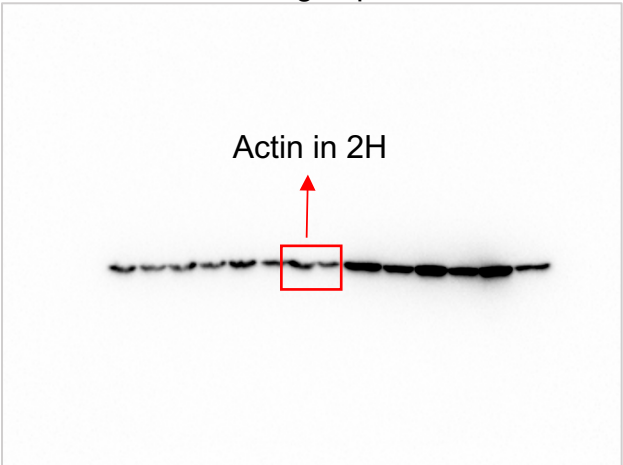

Note: the other lanes are for other experiments.

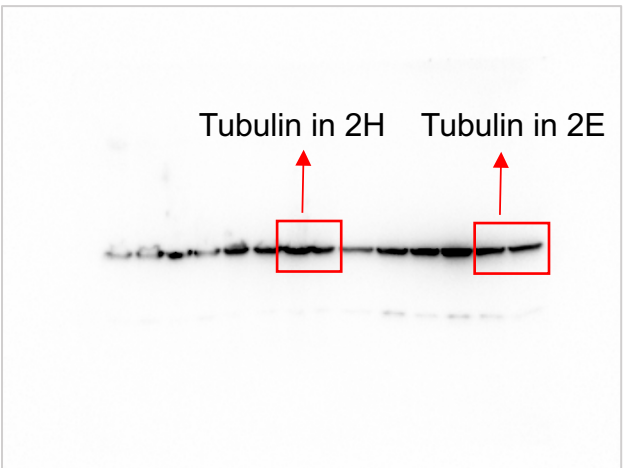

E

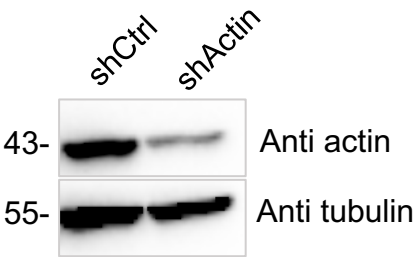

H

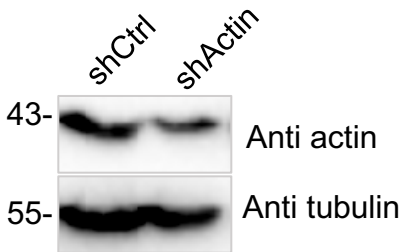

Actin was knocked-down by shRNA in MDA-MB-231 (E) or HEK293T (H) cells.
