# Supplementary material for: Syncytin-mediated open-ended membrane tubular connections facilitate the intercellular transfer of cargos including Cas9 protein
Source: eLife journal article supplement (doi:10.7554/elife.84391), 2023-03-10
Supplement: fig3-figsupp2-data6 [file elife-84391-fig3-figsupp2-data6-v2.zip]

Figure 3-figure supplement 2F, 2I

uncropped blots

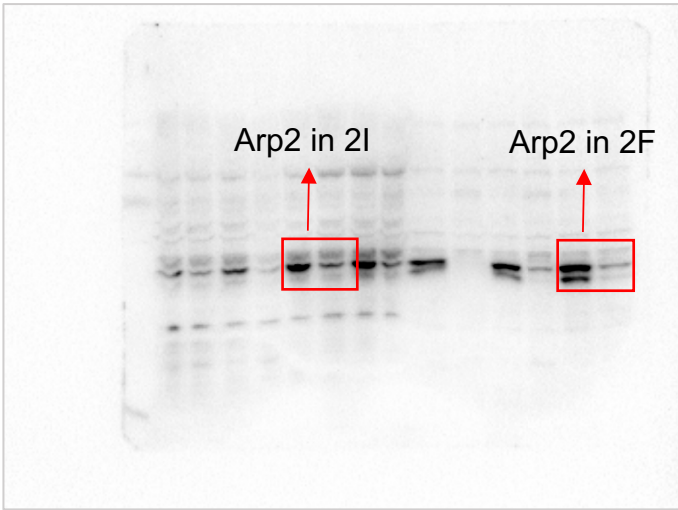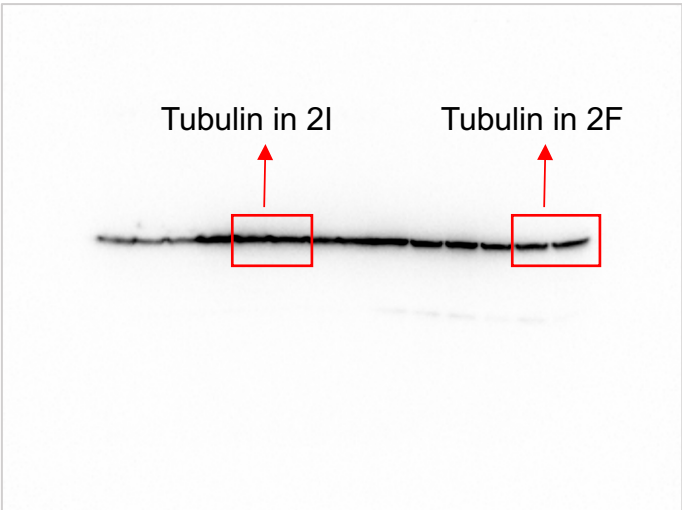

Note: the other lanes are for other experiments.

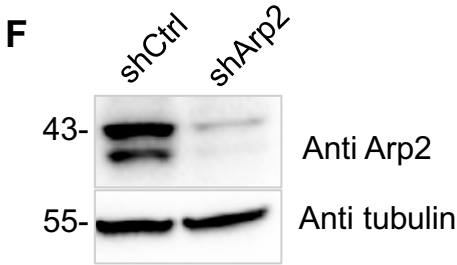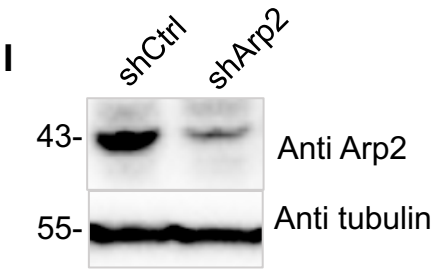

Arp2 was knocked-down by shRNA in MDA-MB-231 (F) or HEK293T (I) cells.
