# Supplementary material for: Syncytin-mediated open-ended membrane tubular connections facilitate the intercellular transfer of cargos including Cas9 protein
Source: eLife journal article supplement (doi:10.7554/elife.84391), 2023-03-10

Figure 3-figure supplement 2G, 2J

uncropped blots

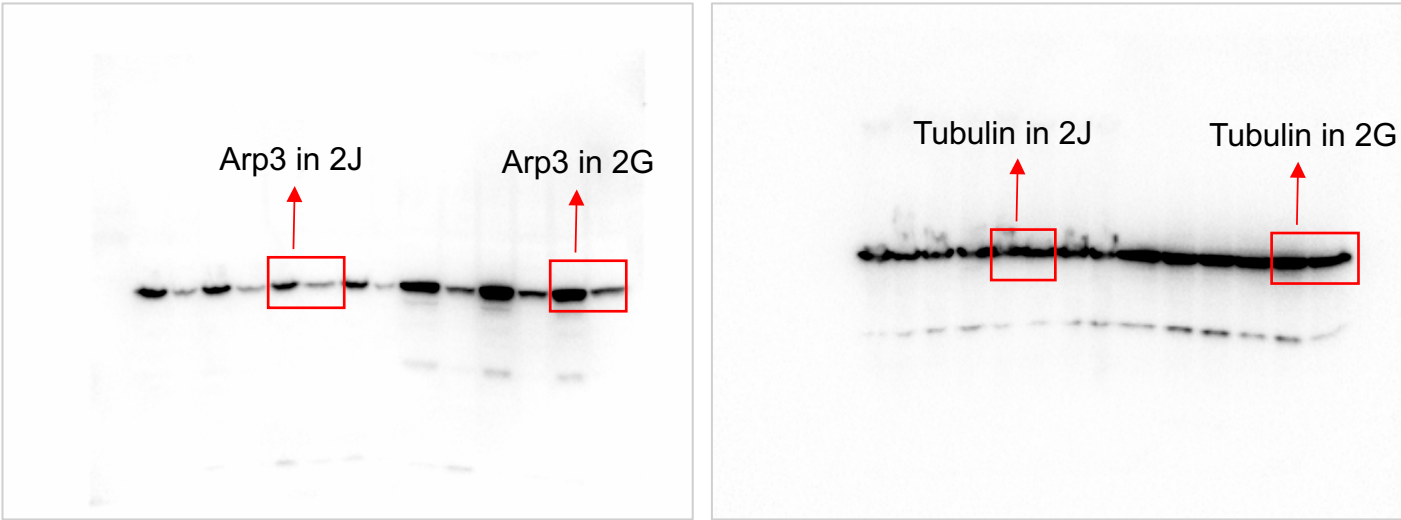

Note: the other lanes are for other experiments.

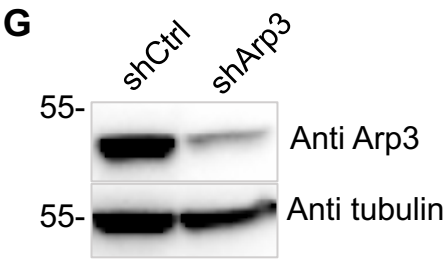

Arp3 was knocked-down by shRNA in MDA-MB-231 (G) or HEK293T (J) cells.

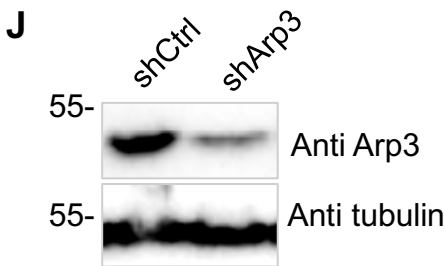

Supplement: fig3-figsupp2-data7 [file elife-84391-fig3-figsupp2-data7-v2.zip]
