# Supplementary material for: Syncytin-mediated open-ended membrane tubular connections facilitate the intercellular transfer of cargos including Cas9 protein
Source: eLife journal article supplement (doi:10.7554/elife.84391), 2023-03-10
Supplement: fig7-figsupp1-data1 [file elife-84391-fig7-figsupp1-data1-v2.zip]

# Figure 7-figure supplement 1A

uncropped blots

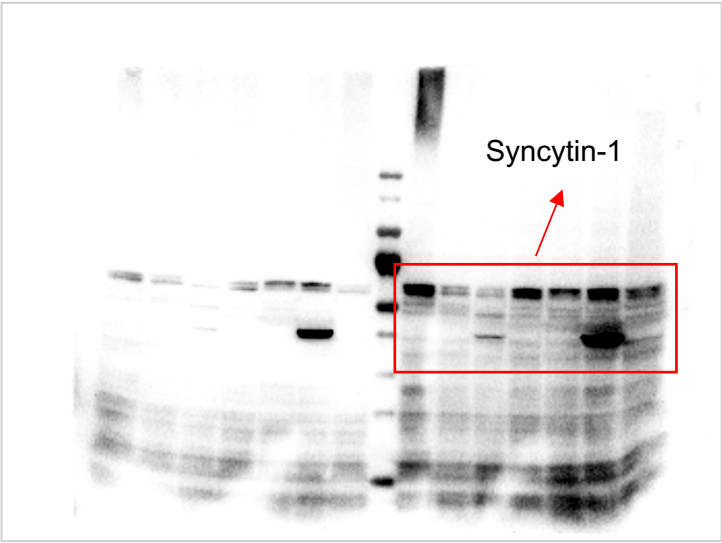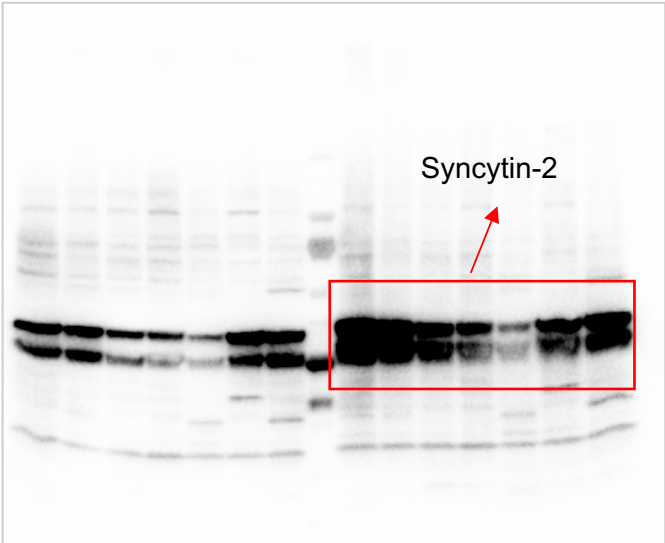

Note: the other lanes are for other experiments. The bands at other positions may be unspecific bands.

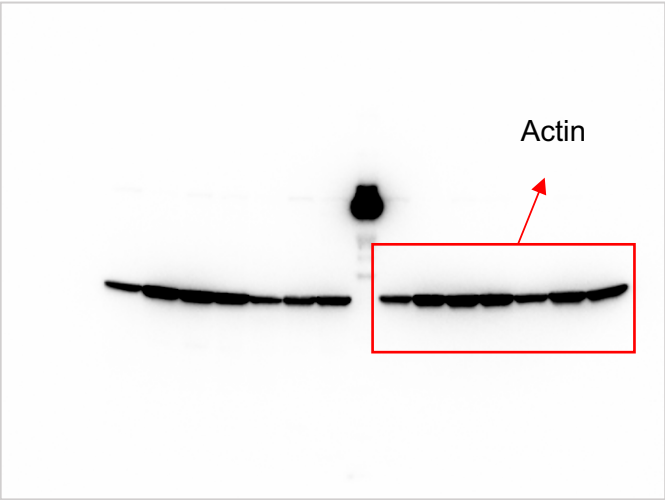

**A**

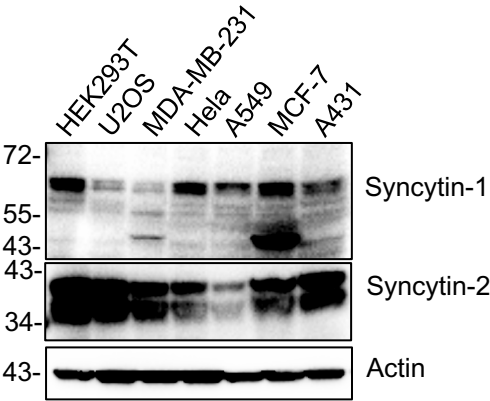

Human endogenous fusogen, syncytins expressed in different cell lines.
