# Supplementary material for: Syncytin-mediated open-ended membrane tubular connections facilitate the intercellular transfer of cargos including Cas9 protein
Source: eLife journal article supplement (doi:10.7554/elife.84391), 2023-03-10
Supplement: fig7-figsupp1-data3 [file elife-84391-fig7-figsupp1-data3-v2.zip]

Figure 7-figure supplement 1D

uncropped blots

Long exposure

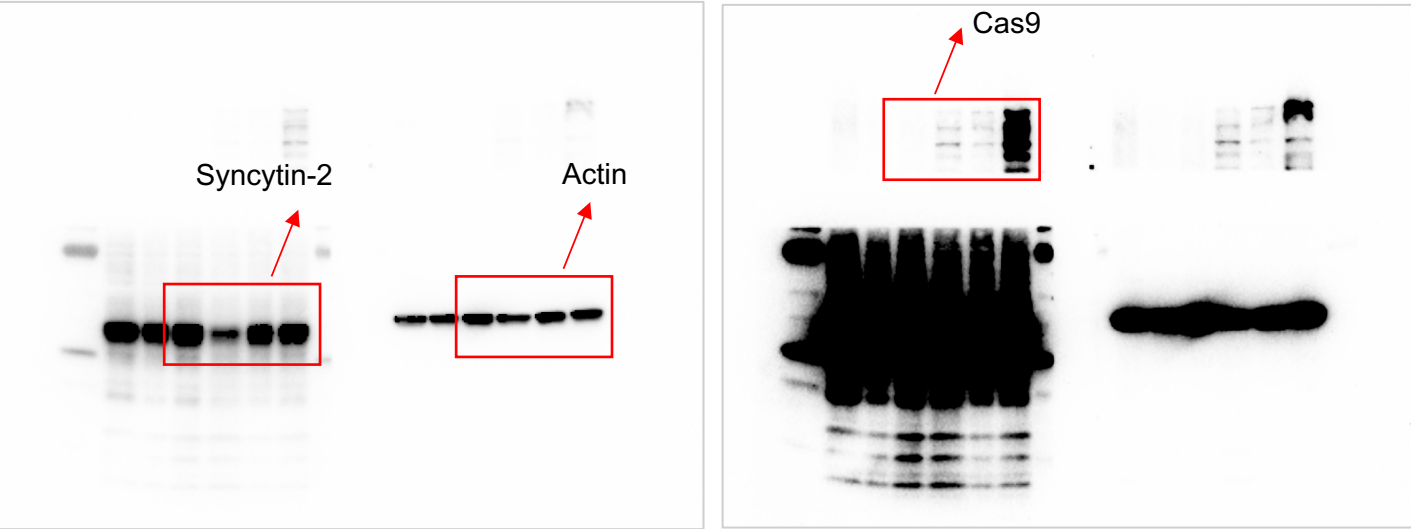

Note: the other lanes are for other experiments. The bands at other positions may be unspecific bands.

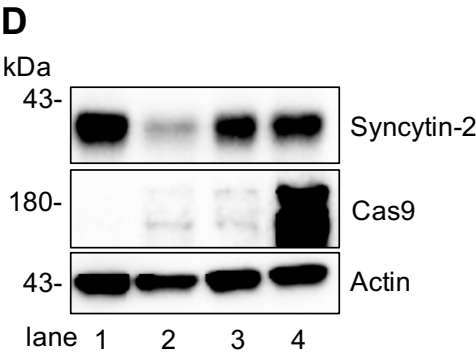

Syncytin-2 was knocked-down in MDA-MB-231 reporter cells using CRISPRi. Lane 1, reporter cell with control plasmid; lane 2, reporter cell with low level of dCas9 and gRNA for syncytin-2 knockdown; lane 3, reporter cell with low level of dCas9 only; lane 4, reporter cell with high level of dCas9 only.
