# Supplementary material for: Syncytin-mediated open-ended membrane tubular connections facilitate the intercellular transfer of cargos including Cas9 protein
Source: eLife journal article supplement (doi:10.7554/elife.84391), 2023-03-10
Supplement: fig7-figsupp1-data4 [file elife-84391-fig7-figsupp1-data4-v2.zip]

Figure 7-figure supplement 1F

uncropped blots

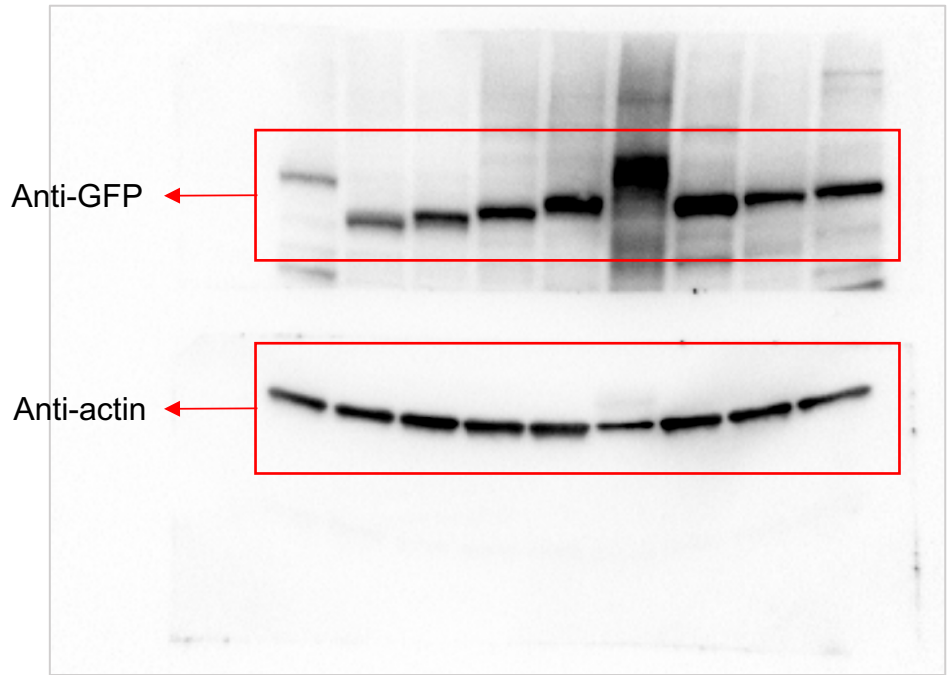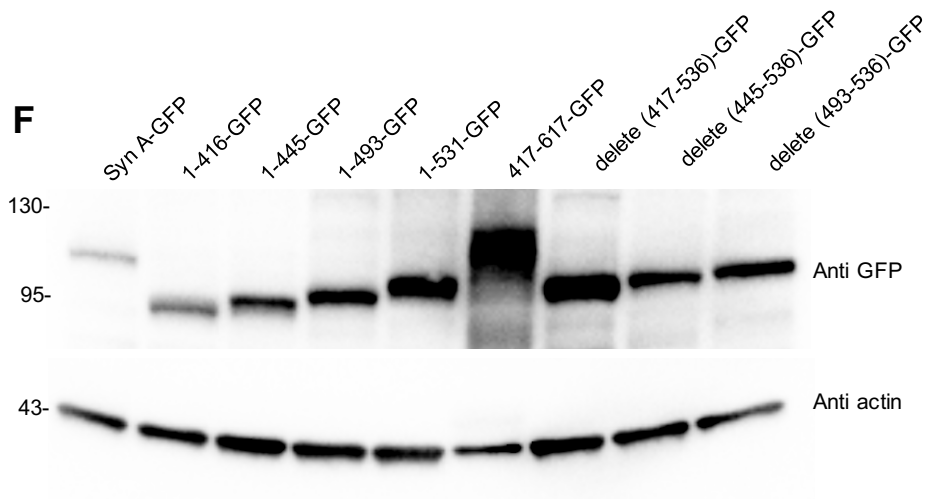

The GFP-fused syncytin-A truncations were expressed in MDA-MB-231 cells and detected by immunoblot.
