# Supplementary material for: Syncytin-mediated open-ended membrane tubular connections facilitate the intercellular transfer of cargos including Cas9 protein
Source: eLife journal article supplement (doi:10.7554/elife.84391), 2023-03-10
Supplement: fig7-figsupp1-data6 [file elife-84391-fig7-figsupp1-data6-v2.zip]

# Figure 7-figure supplement 1H

uncropped blots

Long exposure

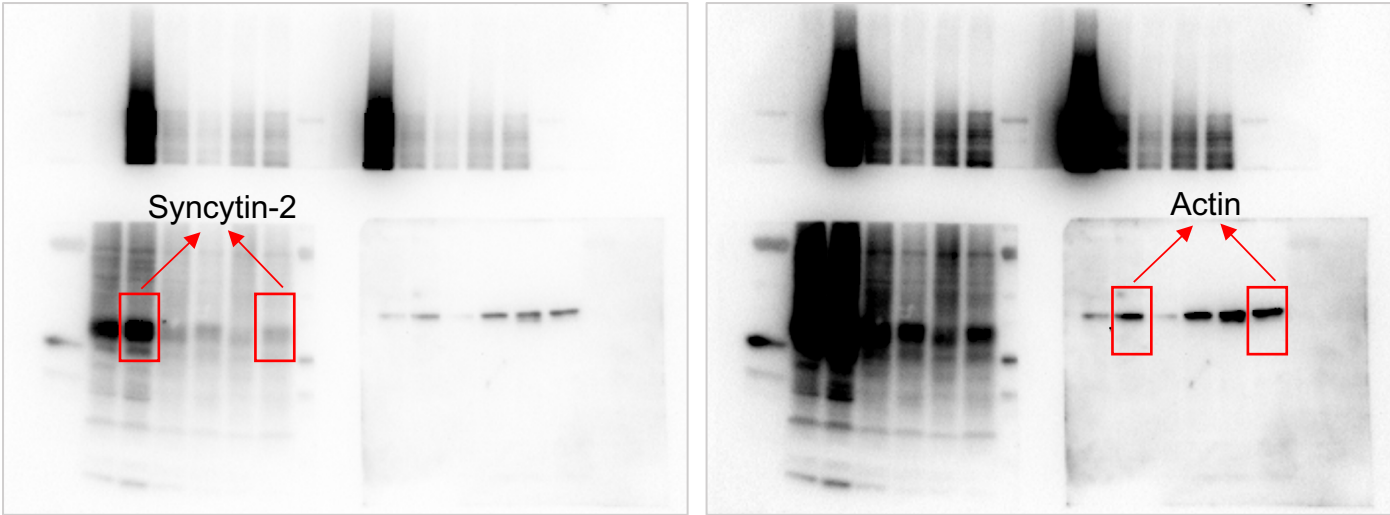

Note: the other lanes are for other experiments. The bands at other positions may be unspecific bands.

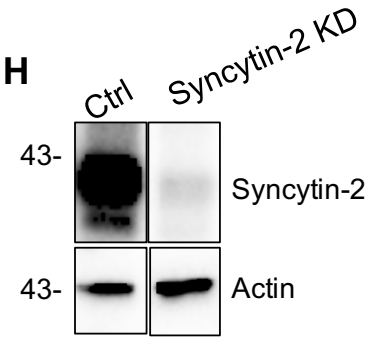

Syncytin-2 was knocked-down in HEK293T with stable overexpression of SBP tagged Cas9-GFP/gRNA.
