# Supplementary material for: Syncytin-mediated open-ended membrane tubular connections facilitate the intercellular transfer of cargos including Cas9 protein
Source: eLife journal article supplement (doi:10.7554/elife.84391), 2023-03-10
Supplement: fig9-data2 [file elife-84391-fig9-data2-v2.zip]

Figure 9D

uncropped blots

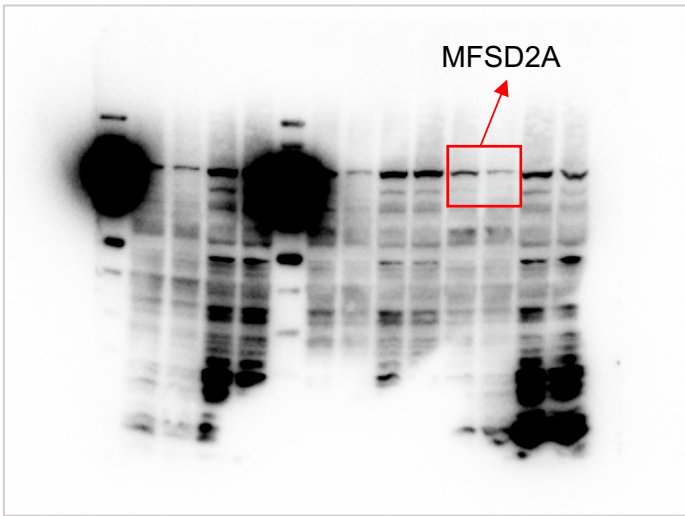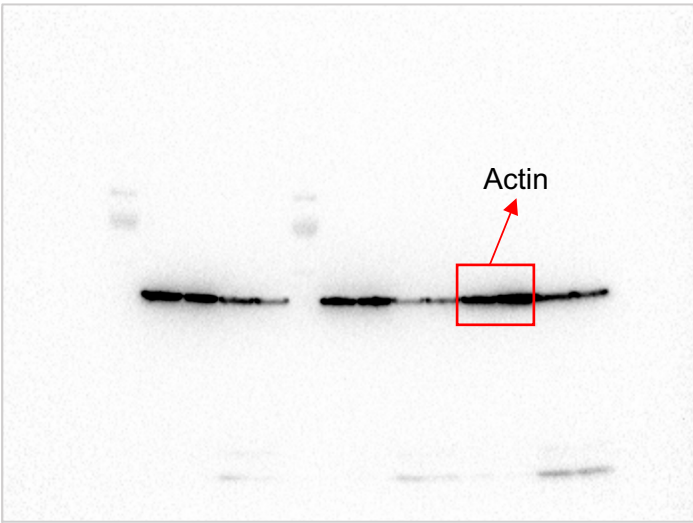

Note: the other lanes are for other experiments. The bands at other positions may be unspecific bands.

D

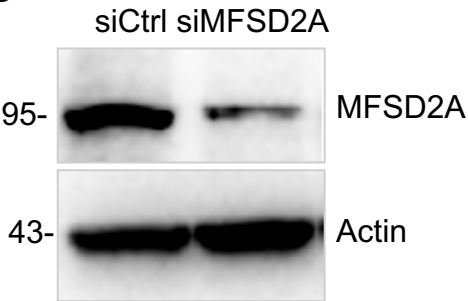

MFSD2A was knocked-down in MDA-MB-231 with reporter plasmid.
