# Supplementary figures and images for: Syncytin-mediated open-ended membrane tubular connections facilitate the intercellular transfer of cargos including Cas9 protein
Source: eLife journal article supplement (doi:10.7554/elife.84391), 2023-03-10

# Figure 1-figure supplement 1A

uncropped blots

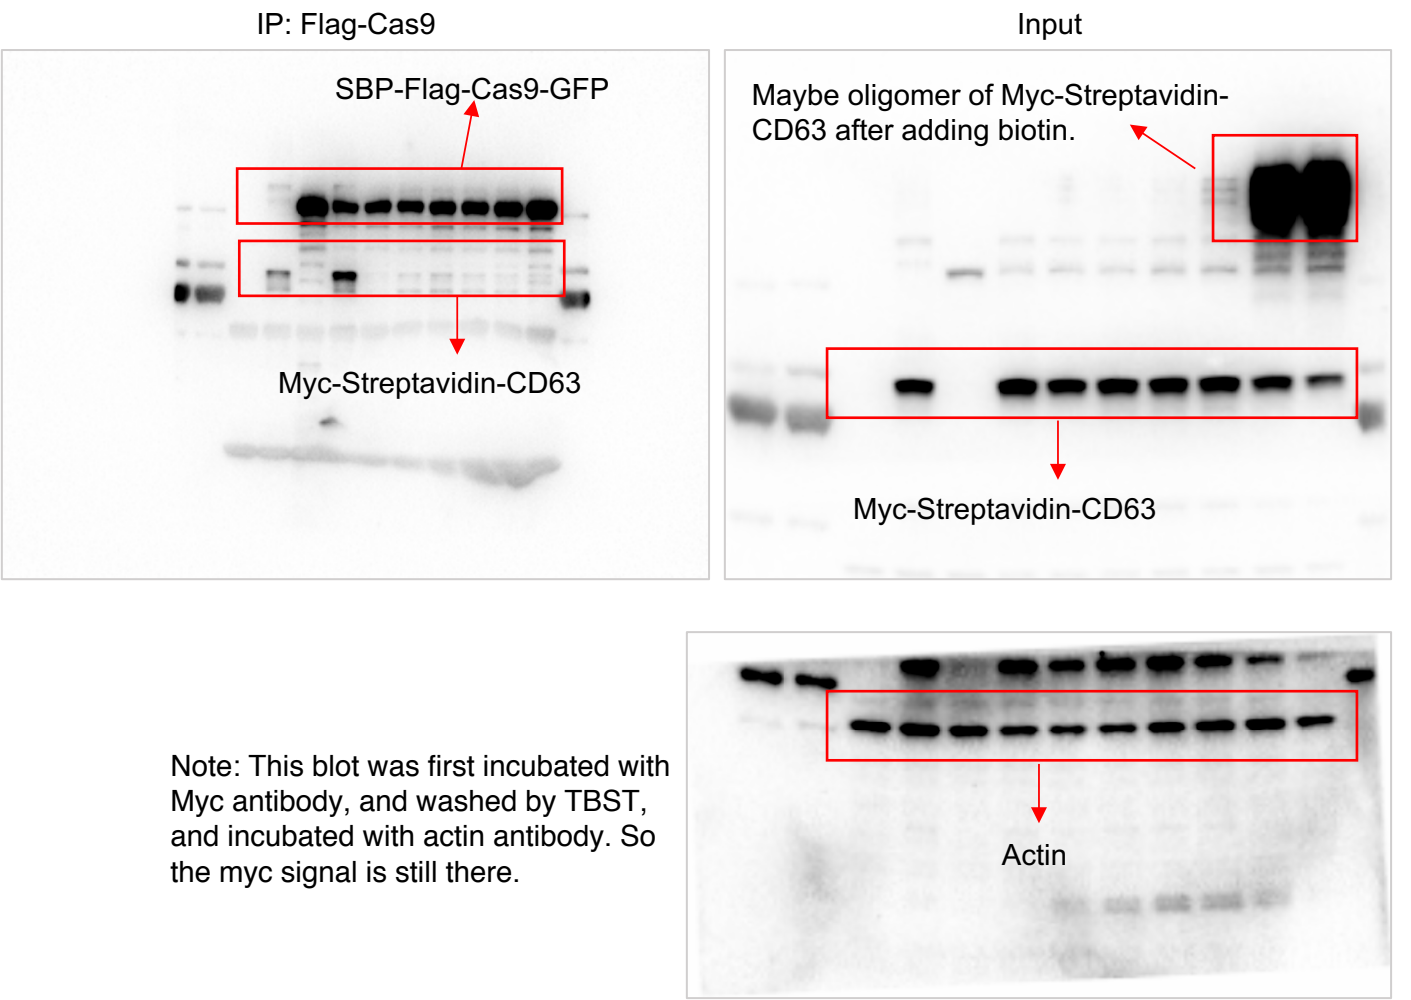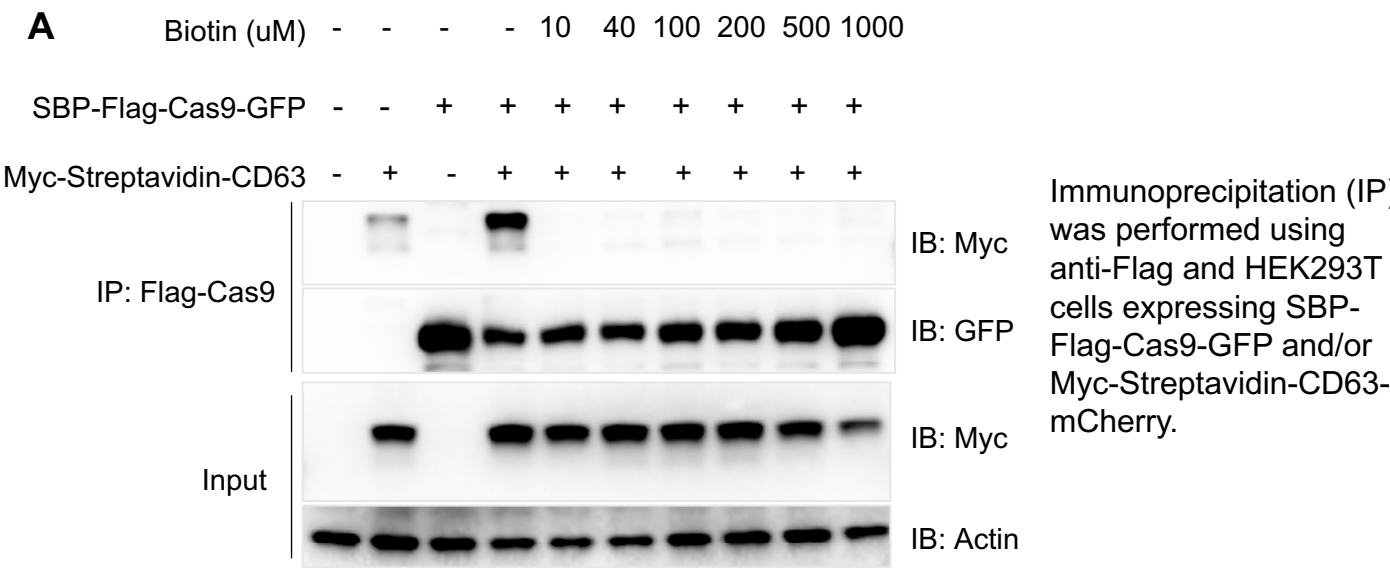

Supplement: fig1-figsupp1-data1 [file elife-84391-fig1-figsupp1-data1-v2.zip]

**Figure 3-figure supplement 2B**

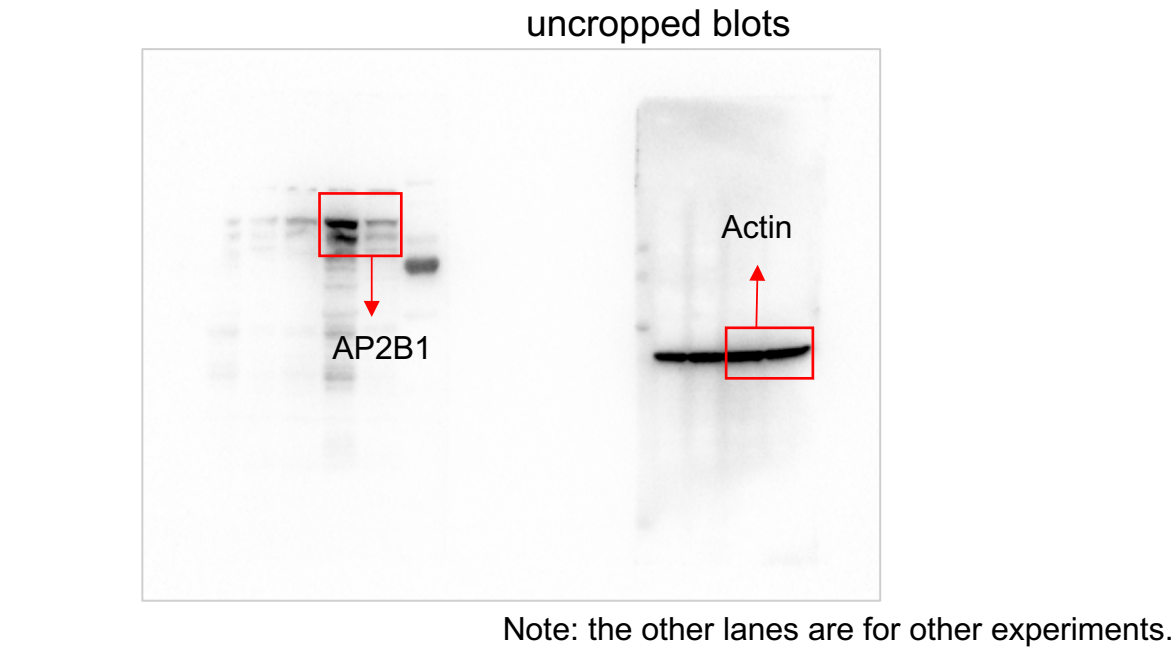

**B**

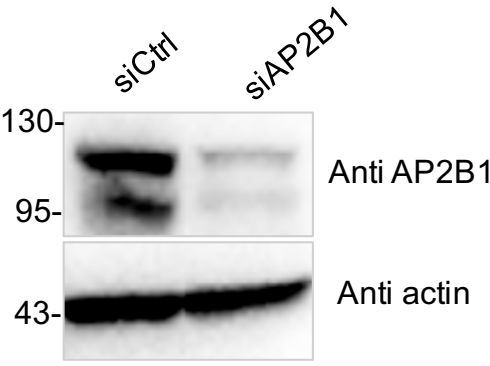

AP2B1 was knocked-down by siRNA in MDA-MB-231 cells.

Supplement: fig3-figsupp2-data2 [file elife-84391-fig3-figsupp2-data2-v2.zip]

Figure 3-figure supplement 2C

uncropped blots

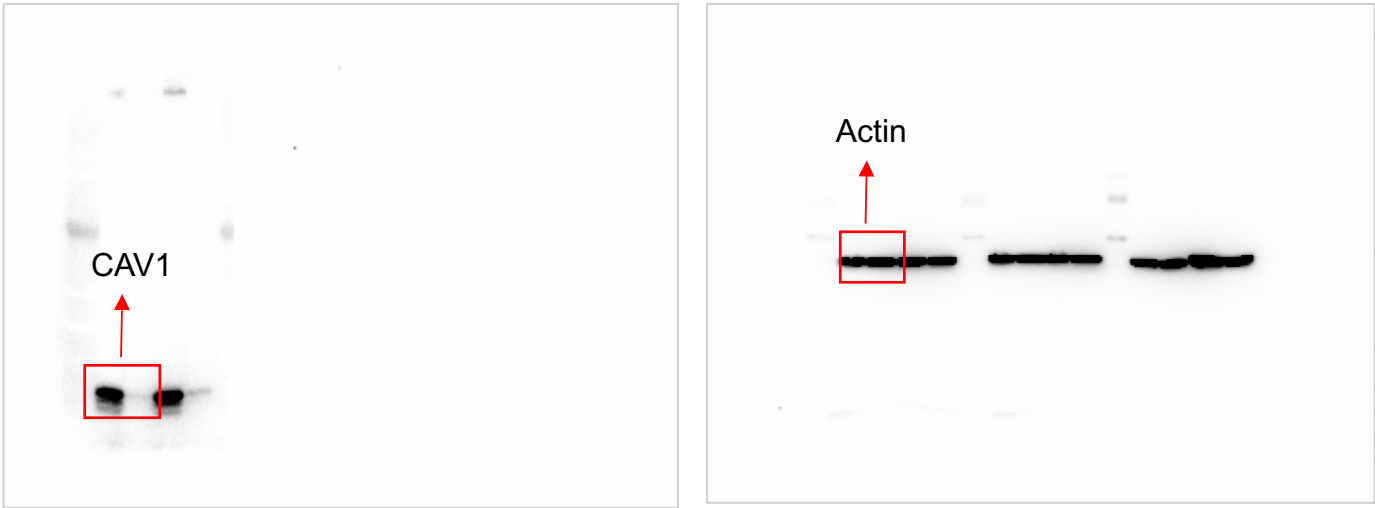

Note: the other lanes are for other experiments.

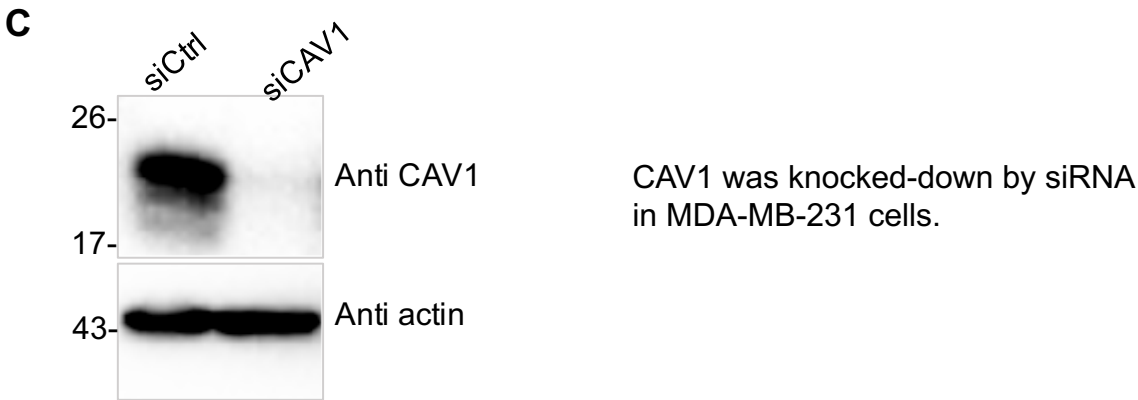

Supplement: fig3-figsupp2-data3 [file elife-84391-fig3-figsupp2-data3-v2.zip]
